# Supplementary material for: A Branch-and-Bound Algorithm for the Knapsack Problem with Conflict Graph
Source: Atypon-hosted journal article supplement (doi:10.1287/ijoc.2016.0742), 2017-06-01
Supplement: ijoc.2016.0742-sm.pdf [file ijoc.2016.0742-sm.pdf]

Online Supplement to the paper  
A Branch-and-Bound Algorithm for the Knapsack  
Problem with Conflict Graph

Andrea Bettinelli

OPTIT Srl, Viale Amendola 56/D, 40026 Imola (BO), Italy, andrea.bettinelli@optit.net,

Valentina Cacchiani, Enrico Malaguti

DEI, Università di Bologna, Viale Risorgimento 2, 40136 Bologna, Italy, valentina.cacchiani@unibo.it,  
enrico.malaguti@unibo.it,

---

| B&C   |        |        |        |         |        |         |
|-------|--------|--------|--------|---------|--------|---------|
| R1    |        | R3     |        | R10     |        |         |
| class | solved | time   | solved | time    | solved | time    |
| 1     | 90     | 0.094  | 90     | 2.099   | 90     | 4.318   |
| 2     | 90     | 0.604  | 81     | 61.900  | 76     | 443.211 |
| 3     | 90     | 6.739  | 71     | 136.362 | 10     | 21.056  |
| 4     | 90     | 51.941 | 54     | 275.335 | 8      | 971.980 |
| 5     | 90     | 0.012  | 90     | 0.122   | 90     | 0.148   |
| 6     | 90     | 0.046  | 90     | 2.600   | 90     | 4.408   |
| 7     | 90     | 0.223  | 83     | 135.363 | 83     | 564.396 |
| 8     | 90     | 0.920  | 70     | 93.791  | 10     | 6.897   |

| B&C   |        |        |        |         |        |         |
|-------|--------|--------|--------|---------|--------|---------|
| C1    |        | C3     |        | C10     |        |         |
| class | solved | time   | solved | time    | solved | time    |
| 1     | 90     | 5.299  | 90     | 6.038   | 90     | 6.629   |
| 2     | 90     | 4.460  | 80     | 152.277 | 57     | 737.085 |
| 3     | 88     | 38.681 | 50     | 353.655 | 5      | 772.756 |
| 4     | 78     | 35.190 | 25     | 300.689 | 0      | 0       |
| 5     | 90     | 0.024  | 90     | 0.213   | 90     | 0.266   |
| 6     | 90     | 0.069  | 89     | 10.019  | 80     | 7.776   |
| 7     | 90     | 0.561  | 55     | 212.111 | 43     | 785.848 |
| 8     | 90     | 7.131  | 47     | 112.361 | 0      | 0       |

**Table 1** Branch-and-cut algorithm on the random and correlated datasets. Results aggregated by class.

## References

- R. Sadykov and F. Vanderbeck. Bin packing with conflicts: a generic branch-and-price algorithm. *INFORMS Journal on Computing*, 25(2):244–255, 2013.

| B&C     |        |        |        |         |        |         |
|---------|--------|--------|--------|---------|--------|---------|
| density | R1     |        | R3     |         | R10    |         |
|         | solved | time   | solved | time    | solved | time    |
| 0.1     | 80     | 0.104  | 80     | 0.111   | 78     | 103.899 |
| 0.2     | 80     | 0.232  | 80     | 0.642   | 50     | 145.132 |
| 0.3     | 80     | 0.378  | 80     | 5.978   | 50     | 130.858 |
| 0.4     | 80     | 0.516  | 80     | 23.535  | 50     | 89.906  |
| 0.5     | 80     | 0.676  | 80     | 99.606  | 50     | 145.784 |
| 0.6     | 80     | 0.912  | 74     | 123.787 | 50     | 243.683 |
| 0.7     | 80     | 2.647  | 70     | 177.919 | 50     | 386.466 |
| 0.8     | 80     | 8.731  | 51     | 210.516 | 42     | 401.135 |
| 0.9     | 80     | 53.955 | 34     | 148.749 | 37     | 198.372 |

| B&C     |        |        |        |         |        |         |
|---------|--------|--------|--------|---------|--------|---------|
| density | C1     |        | C3     |         | C10    |         |
|         | solved | time   | solved | time    | solved | time    |
| 0.1     | 80     | 0.085  | 79     | 1.520   | 35     | 121.509 |
| 0.2     | 80     | 0.208  | 80     | 34.695  | 30     | 3.213   |
| 0.3     | 80     | 0.328  | 76     | 86.569  | 39     | 339.325 |
| 0.4     | 80     | 0.440  | 70     | 92.983  | 50     | 296.338 |
| 0.5     | 80     | 0.777  | 56     | 263.788 | 50     | 175.402 |
| 0.6     | 80     | 8.990  | 42     | 67.828  | 50     | 235.713 |
| 0.7     | 77     | 7.999  | 44     | 84.256  | 50     | 522.456 |
| 0.8     | 79     | 27.649 | 49     | 374.732 | 31     | 53.813  |
| 0.9     | 70     | 58.020 | 30     | 3.659   | 30     | 5.510   |

Table 2 Branch-and-cut algorithm on the random and correlated datasets. Results aggregated by density.

| items/cap | density | RANDOM                                  |        | CORRELATED                              |         |
|-----------|---------|-----------------------------------------|--------|-----------------------------------------|---------|
|           |         | Sadykov and Vanderbeck (2013)<br>solved | time   | Sadykov and Vanderbeck (2013)<br>solved | time    |
| 500/1000  | 0.001   | 10                                      | 0.01   | 10                                      | 119.13  |
|           | 0.002   | 10                                      | 0.10   | 9                                       | 173.89  |
|           | 0.005   | 10                                      | 3.13   | 8                                       | 505.68  |
|           | 0.01    | 10                                      | 66.39  | 6                                       | 716.77  |
|           | 0.02    | 7                                       | 853.44 | 0                                       | -       |
|           | 0.05    | 1                                       | 691.04 | 0                                       | -       |
| 500/2000  | 0.001   | 10                                      | 0.30   | 8                                       | 98.71   |
|           | 0.002   | 10                                      | 2.59   | 5                                       | 245.84  |
|           | 0.005   | 9                                       | 141.32 | 1                                       | 1143.41 |
|           | 0.01    | 0                                       | -      | 0                                       | -       |
|           | 0.02    | 0                                       | -      | 0                                       | -       |
|           | 0.05    | 0                                       | -      | 0                                       | -       |
| 1000/1000 | 0.001   | 10                                      | 0.17   | 5                                       | 53.83   |
|           | 0.002   | 10                                      | 6.44   | 5                                       | 177.96  |
|           | 0.005   | 8                                       | 265.46 | 0                                       | -       |
|           | 0.01    | 0                                       | -      | 0                                       | -       |
|           | 0.02    | 0                                       | -      | 0                                       | -       |
|           | 0.05    | 0                                       | -      | 0                                       | -       |
| 1000/2000 | 0.001   | 9                                       | 16.88  | 2                                       | 169.87  |
|           | 0.002   | 7                                       | 511.99 | 1                                       | 1486.86 |
|           | 0.005   | 0                                       | -      | 0                                       | -       |
|           | 0.01    | 0                                       | -      | 0                                       | -       |
|           | 0.02    | 0                                       | -      | 0                                       | -       |
|           | 0.05    | 0                                       | -      | 0                                       | -       |

**Table 3** Results obtained by the algorithm proposed in Sadykov and Vanderbeck (2013) on the low density instances.
